# Supplementary material for: Birdsong “Transcriptomics”: Neurochemical Specializations of the Oscine Song System
Source: PubMed Central journal article supplement (PMC2563692; doi:10.1371/journal.pone.0003440), 2008-10-20
Supplement: pone.0003440.s002.pdf [file pone.0003440.s002.pdf]

**Table S1. Primary FDR < 0.05 HVC Marker.**

| <b>Entrez<br/>Gene Nam</b> | <b>Gene Annotation</b>                                    | <b>Genbank<br/>Accession No.</b> | <b>Gene<br/>Regulation</b> | <b>Literature*<br/>Cited</b> |
|----------------------------|-----------------------------------------------------------|----------------------------------|----------------------------|------------------------------|
| ABCC5                      | ATP-binding cassette sub-family C member 5                | DV960769                         | +                          | 9, 30                        |
| ADAM23                     | A disintegrin and metallopeptidase domain 23              | CK305463, CK306577, DV961129     | +                          |                              |
| ADSSL1                     | Adenylosuccinate synthetase 1                             | CK312450                         | +                          |                              |
| AHNAK2                     | Neuroblast differentiation-associated protein AHNAK       | CK305980                         | +                          | 24, 101                      |
| AIFM1                      | Apoptosis-inducing factor, mitochondrion-associated, 1    | DV954850                         | +                          |                              |
| AIM1                       | Absent in melanoma 1, predicted                           | DV953279                         | +                          |                              |
| ALDH1A2                    | Retinal dehydrogenase 2 (RalDH2)                          | CK234972, DV957057               | +                          |                              |
| ANK1                       | Ankyrin 1 isoform 3                                       | DV958864                         | +                          | 90                           |
| ANXA6                      | Annexin A6 (Annexin VI) Splice variant of DV958616        | DV958615                         | +                          | 6                            |
| ANXA6                      | Annexin A6 (Annexin VI) Splice variant of DV958615        | DV958216                         | +                          |                              |
| ATP1B4                     | Sodium/potassium-transporting ATPase beta-4 chain         | CK313848                         | +                          |                              |
| AYTL1                      | Acyltransferase like 1                                    | CK306691                         | +                          |                              |
| C1orf34                    | Hypothetical protein DEME-6, KIAA0452                     | DV955796                         | +                          | 50                           |
| C20orf3                    | Hypothetical protein LOC416715                            | DV950007                         | +                          |                              |
| C6orf168                   | Hypothetical protein LOC84553                             | DV953368                         | +                          |                              |
| CABP1                      | Calcium-binding protein 1 (CaBP1)                         | DV951925, DV959391               | +                          | 54, 117                      |
| CADPS2                     | Ca <sup>2+</sup> -dependent secretion activator isoform 3 | DV955943                         | +                          | 93                           |
| <u>CALCR</u>               | Calcitonin receptor isoform b precursor                   | DV948514                         | +                          |                              |
| CAMK1D                     | Calcium/calmodulin-dependent protein kinase 1D            | CK310981, CK316602               | +                          |                              |
| CAMTA1                     | Calmodulin-binding transcription activator 1              | CK313520                         | +                          | 34                           |
| CD59                       | CD59 glycoprotein precursor (Membrane at                  | CK310319                         | +                          |                              |
| CD99L2                     | CD99 molecule-like 2                                      | DV959159                         | +                          | 92                           |
| CHGB                       | Chromogranin B (secretogranin 1) (CHGB)                   | CK308123                         | +                          |                              |
| CHRNA5                     | Cholinergic receptor nicotinic alpha 5                    | DV949835                         | +                          |                              |
| CHRNA7                     | Neuronal acetylcholine receptor protein, alpha-7          | CK304602, DV957289               | +                          |                              |
| COL21A1                    | Collagen type XXI alpha 1 precursor                       | CK304548                         | +                          |                              |
| COL4A2                     | Alpha 2 type IV collagen preproprotein                    | DV950044                         | +                          |                              |
| CPM                        | Carboxypeptidase M precursor                              | DV952396                         | +                          |                              |
| CRHBP                      | Corticotropin-releasing factor binding protein            | DV945761, DV955207               | +                          | 106                          |

|              |                                                           |                    |   |        |
|--------------|-----------------------------------------------------------|--------------------|---|--------|
| CRISPLD1     | Cysteine-rich secretory protein LCCL domain containing 1  | DV952515           | + |        |
| CXCL14       | Chemokine (C-X-C motif) ligand 14                         | DV959392           | + |        |
| DCN          | Decorin precursor (Bone proteoglycan II)                  | CK304538, DV960642 | + |        |
| DIP2A        | Similar to Disco-interacting protein 2 homolog A          | CK316189           | + | 115    |
| DNAPTP6      | DNA polymerase-transactivated protein 6                   | DV951746           | + |        |
| DOK4         | Docking protein 4                                         | DV948997           | + | 98     |
| DPP10        | Inactive dipeptidyl peptidase 10                          | CK308156, CK312699 | + | 37     |
| DPP6         | Dipeptidyl-peptidase 6 isoform 1                          | DV956959           | + | 70     |
| ENDOGL1      | Endonuclease G-like 1 (Endo G-like)                       | DV958598           | + |        |
| FAM13A1      | Family with sequence similarity 13 member A1              | DV950254           | + |        |
| FASN         | Fatty acid synthase                                       | DV946694           | + |        |
| FNTM2        | Fibronectin type III and transmembrane                    | CK234984, DV954885 | + | 3      |
| FOSL2        | Fos-like antigen 2                                        | CK235813           | + |        |
| FST          | Follistatin precursor                                     | CK304072, CK309792 | + | 10     |
| <u>GABRE</u> | Gamma-aminobutyric acid (GABA) A receptor, epsilon        | DV945174           | + |        |
| GBAS         | Protein NipSnap2                                          | CK309317           | + |        |
| GPC3         | Glypican 3                                                | CK309542           | + | 64     |
| GPI          | Glucose-6-phosphate isomerase                             | DV961633           | + |        |
| <u>HTR1F</u> | 5-hydroxytryptamine (serotonin) receptor 1F               | CK301212, CK302146 | + |        |
| <u>IL4R</u>  | Interleukin-4 receptor alpha-chain                        | DV954148           | + |        |
| <u>INF2</u>  | Hypothetical protein LOC64423 isoform 1                   | DV953705           | + |        |
| <u>ITGAX</u> | ITGAX integrin, alpha X ( comp 3 receptor 4 subunit)      | DV953883           | + |        |
| KCNA1        | Potassium voltage-gated channel subfamily A               | CK234562           | + |        |
| KIAA1604     | MKIAA1604 protein                                         | DV949108           | + |        |
| LGMN         | Legumain preproprotein                                    | CK313657           | + |        |
| LMO2         | LIM domain only 2 (rhombotin-like 1)                      | DV948088           | + |        |
| LMO3         | LIM domain only 3                                         | DV945566           | + |        |
| LOC400120    | Hypothetical protein LOC418900                            | DV958430           | + |        |
| MAP1B        | Microtubule-associated protein 1B isoform 2               | DV961164           | + |        |
| MAP4         | Microtubule-associated protein 4                          | DV960946           | + |        |
| MAPK11       | Mitogen-activated protein kinase 11                       | CK310452           | + |        |
| MCF2         | Mcf2 transforming sequence-like                           | DV952149           | + | 31, 46 |
| MGC42105     | Hypothetical protein (protein amino acid phosphorylation) | CK306856           | + |        |

|            |                                                         |          |   |               |
|------------|---------------------------------------------------------|----------|---|---------------|
| MUSTN1     | Musculoskeletal, embryonic nuclear protein 1            | DV958286 | + |               |
| NBL1       | Neuroblastoma, suppression of tumorigenicity 1          | DV950926 | + | 5             |
| NDRG4      | NDRG family member 4                                    | CK311117 | + | 5, 33, 75     |
| NEFH       | Neurofilament heavy polypeptide 200kDa                  | CK235399 | + |               |
| NEFL       | Neurofilament triplet L protein                         | CK304961 | + |               |
| NEFM       | Neurofilament 3 medium                                  | CK313443 | + |               |
| NETO1      | Neuropilin and tolloid-like protein 1                   | DV957928 | + |               |
| NPY2R      | Neuropeptide Y receptor type 2                          | CK315377 | + |               |
| NR3C2      | Nuclear receptor subfamily 3 group C member 2           | DV949530 | + | 57, 103       |
| NRP1       | Neuropilin 1 isoform a                                  | DV955873 | + |               |
| NTS        | Neurotensin/neuromedin N precursor                      | CK302282 | + |               |
| PARD3      | Partitioning-defective protein 3 homolog                | DV955889 | + |               |
| PDE8B      | Phosphodiesterase 8B                                    | DV960566 | + |               |
| PDZRN3     | PDZ domain containing RING finger 3                     | CK304327 | + | 27, 44, 62    |
| PGM1       | Phosphoglucomutase-1                                    | DV959732 | + |               |
| PLXNA4     | Plexin-A4                                               | DV951095 | + | 94            |
| PPP4R2     | Protein phosphatase 4 regulatory subunit 2              | DV946429 | + |               |
| PRDM11     | PR domain containing 11                                 | DV959665 | + |               |
| PRKRIP1    | PRKR interacting protein 1 (IL11 inducible)             | DV946957 | + | 112           |
| PTGER4     | Prostaglandin E receptor 4 subtype                      | DV958814 | + |               |
| PTPRF      | Protein tyrosine phosphatase receptor type F            | DV959888 | + | 86            |
| PVALB      | Parvalbumin, muscle.                                    | CK305573 | + |               |
| PYGB       | Brain glycogen phosphorylase                            | CK313966 | + |               |
| QSOX6      | Quiescin/sulfhydryl oxidase                             | DV957118 | + | 97            |
| RAB39      | Rab-related GTP-binding protein                         | DV957379 | + |               |
| RASGRP1    | Ras guanyl releasing protein 1                          | CK316065 | + |               |
| RCAN2      | Regulator of calcineurin 2                              | CK313417 | + | 25            |
| RGS4       | Regulator of G-protein signalling 4                     | CK314393 | + | 26, 83        |
| RHOB       | Rho-related GTP-binding protein RhoB                    | CK308435 | + | 63,67, 73, 96 |
| RP6-213H19 | Serine/threonine protein kinase MASK; STE20-like kinase | CK235627 | + | 5, 18, 66     |
| S100B      | S-100 calcium-binding protein beta subunit              | DV950377 | + |               |
| SACS       | Sacsin                                                  | CK303077 | + |               |
| SAP30L     | Sin3A associated protein p30-like                       | CK307786 | + | 47, 60        |

|          |                                                                 |                    |   |               |
|----------|-----------------------------------------------------------------|--------------------|---|---------------|
| SCUBE1   | signal peptide-CUB domian-EGF-related 1                         | DV947442           | + |               |
| SCUBE1/2 | Signal peptide CUB domain EGF-like 1                            | CK305644           | + | 32            |
| SETD1B   | SET domain containing 1B                                        | CK315752           | + |               |
| SLC38A10 | Hypothetical protein LOC124565 isoform a                        | DV946074           | + |               |
| SLC7A2   | Solute carrier family 7 member 2 isoform 2                      | CK309001           | + |               |
| SLC8A1   | Solute carrier family 8 (sodium/calcium)                        | DV947699           | + |               |
| SLC9A7   | Sodium/hydrogen exchanger 7 (Na <sup>+</sup> )/H <sup>+</sup> ) | DV950073, DV956252 | + |               |
| SNCG     | Gamma-synuclein (Persyn)                                        | DV945245, DV945607 | + | 39            |
| SOX6     | SRY (sex determining region Y)-box 5                            | CK301414           | + |               |
| ST8SIA4  | ST8 alpha-N-acetyl-neuraminide A2,8-sialyltransferase 4         | DV957771           | + | 4             |
| STARD13  | START domain containing 13 isoform alpha                        | DV961730           | + |               |
| STC2     | stanniocalcin 2                                                 | CK235424           | + | 22            |
| STK11IP  | Serine/threonine kinase 11 interacting protein                  | DV960621           | + |               |
| STMN3    | Stathmin-like 3                                                 | DV949164           | + | 41            |
| SV2B     | Synaptic vesicle glycoprotein 2b                                | CK302240           | + |               |
| SYCP1    | Synaptonemal complex protein 1                                  | CK305087, DV958591 | + |               |
| SYF2     | SYF2 homolog RNA splicing factor isoform 1                      | CK306847           | + | 109           |
| SYNC1    | Syncoilin intermediate filament 1                               | DV953434           | + |               |
| SYNJ1    | Synaptojanin 1 isoform a                                        | CK313607           | + |               |
| TBR1     | T-box brain gene 1                                              | CK301650           | + | 20            |
| THBS4    | Thrombospondin-4 precursor                                      | DV951570           | + |               |
| THOC4    | THO complex 4                                                   | CK301480           | + |               |
| TMEM16E  | Transmembrane protein 16E                                       | DV947412           | + |               |
| TMEM74   | Hypothetical proteins LOC239408, LOC157753                      | DV952526, DV956586 | + |               |
| TMTC1    | ARG99 protein                                                   | CK315830           | + |               |
| TNR      | Tenascin precursor                                              | CK314049           | + | 12, 58, 69,84 |
| TOMM70A  | Translocase of outer mitochondrial membrane 70                  | DV949336           | + |               |
| TRIM8    | Tripartite motif-containing 8                                   | CK305942           | + |               |
| TSPAN9   | Tetraspanin 9                                                   | DV945109           | + |               |
| UBE2E1   | Ubiquitin-conjugating enzyme E2 E1 isoform 1                    | DV948876           | + |               |
| UTS2B    | Prepro-urotensin II-related peptide                             | DV945629           | + |               |
| VLLH2748 | Hypothetical protein VLLH2748                                   | DV959083           | + |               |
| WASL     | Wiskott-Aldrich syndrome gene-like protein                      | DV955503           | + |               |

|         |                                          |                    |   |        |
|---------|------------------------------------------|--------------------|---|--------|
| ZEB2    | Zinc finger homeobox protein 1b          | CK308008, DV946921 | + | 77, 78 |
| ZNF533  | Zinc finger protein 533                  | CK316105           | + |        |
| Unknown |                                          | CK302356           | + |        |
| Unknown |                                          | CK306005           | + |        |
| Unknown |                                          | none               | + |        |
| Unknown |                                          | DV945704           | + |        |
| Unknown |                                          | DV960681           | + |        |
| Unknown |                                          | CK234517           | + |        |
| Unknown |                                          | DV957618           | + |        |
| Unknown |                                          | DV951785           | + |        |
| Unknown |                                          | CK311256           | + |        |
| Unknown |                                          | CK312976           | + |        |
| Unknown |                                          | DV951875           | + |        |
| Unknown |                                          | DV961502           | + |        |
| Unknown |                                          | DV956767           | + |        |
| Unknown |                                          | CK312284           | + |        |
| Unknown |                                          | CK304898           | + |        |
| Unknown |                                          | DV958743           | + |        |
| Unknown |                                          | DV950322           | + |        |
| Unknown |                                          | CK311619           | + |        |
| Unknown |                                          | DV945166           | + |        |
| Unknown |                                          | DV959261           | + |        |
| Unknown |                                          | DV960469           | + |        |
| Unknown |                                          | CK306963           | + |        |
| Unknown |                                          | CK307876           | + |        |
| Unknown |                                          | DV950296           | + |        |
| Unknown | May be an RT.                            | DV949717           | + |        |
| Unknown |                                          | DV952548           | + |        |
| Unknown |                                          | CK306373           | + |        |
| Unknown |                                          | CK315619           | + |        |
| Unknown |                                          | DV948470, DV947307 | + |        |
| Unknown |                                          | DV958960           | + |        |
| ABCA1   | ATP-binding cassette sub-family A (ABC1) | DV946486           | - |        |

|              |                                                         |                              |   |            |
|--------------|---------------------------------------------------------|------------------------------|---|------------|
| ADAMTS8      | ADAM metallopeptidase with thrombospondin type 1        | CK304156                     | - |            |
| <u>ANK3</u>  | Ankyrin 3 epithelial isoform 1                          | DV959675                     | - |            |
| ANKRD12      | Ankyrin repeat domain protein 12 (GAC-1 protein)        | DV955183                     | - |            |
| ANTXR2       | Anthrax toxin receptor 2                                | DV958955                     | - |            |
| AQP1         | Aquaporin-1, complete                                   | DV948000                     | - | 100        |
| ARHGDI1B     | Rho GDP-dissociation inhibitor 2                        | CK305571                     | - | 52, 87     |
| ARL5B        | ADP-ribosylation factor-like 5B                         | CK305762                     | - |            |
| ARPP21       | Cyclic AMP-regulated phosphoprotein 21 kD               | CK308798                     | - |            |
| <u>ASTN1</u> | Astrotactin isoform 1                                   | DV960317                     | - | 116        |
| ATP8A1       | ATPase aminophospholipid transporter                    | CK304944, CK311916           | - |            |
| B3GNT1       | UDP-GlcNAc:BGal B-1,3-N-acetylglucosaminyltransferase 1 | CK312440                     | - |            |
| BAI3         | Brain-specific angiogenesis inhibitor 3                 | CK313813                     | - |            |
| BMPR2        | Bone morphogenetic protein receptor type II             | CK316243                     | - | 55         |
| C14orf147    | Chromosome 14 open reading frame 147                    | DV955829                     | - |            |
| C1orf187     | Hypothetical protein UNQ3119; AGPA3119; MGC117222       | CK235460                     | - |            |
| C1QL3        | Complement component 1 q subcomponent-like 3            | DV960345                     | - |            |
| C3orf39      | Glycosyltransferase                                     | DV948284, CK302348, CK312228 | - |            |
| C5orf30      | Hypothetical protein LOC90355                           | DV956689                     | - |            |
| CACNA1G      | Calcium channel voltage-dependent T type                | CK306076                     | - | 80         |
| CACNG4       | Voltage-dependent calcium channel gamma-subunit         | DV953758, DV947575           | - |            |
| CAMK2D       | Calcium/calmodulin-dependent protein kinase II delta    | CK234141                     | - | 5          |
| CAP2         | CAP adenylate cyclase-associated protein 2              | CK304498                     | - |            |
| CCK          | Cholecystokinins precursor (CCK) [Contai                | CK302967                     | - |            |
| CHODL        | Chondrolectin precursor                                 | CK308108, CK304078           | - |            |
| CHST11       | Carbohydrate sulfotransferase 11                        | CK317232                     | - | 43         |
| <u>CHST2</u> | Carbohydrate (N-acetylglucosamine-6-O)                  | CK308681                     | - |            |
| <u>CLMN</u>  | Calponin like transmembrane domain protein              | CK310744                     | - | 36, 69, 95 |
| CNOT6        | CCR4-NOT transcription complex subunit 6                | DV946818                     | - |            |
| CPNE2        | Copine-2 (Copine II)                                    | DV960053, DV960587           | - |            |
| CPNE8        | Copine-8 (Copine VIII)                                  | CK235787                     | - |            |
| <u>CREB1</u> | cAmp response element binding protein 1                 | DV953443                     | - |            |
| CYP19A1      | Aromatase; P450, family 19, subfamily A                 | DV951351, DV954113           | - |            |
| CYP1B1       | Cytochrome P450 family 1 subfamily B                    | DV958401                     | - |            |

|         |                                                   |                                 |   |            |
|---------|---------------------------------------------------|---------------------------------|---|------------|
| DACH2   | Dach2 protein                                     | DV959755                        | - |            |
| DACT1   | Dapper 1 isoform 2                                | CK311605                        | - |            |
| DHRS2   | Dehydrogenase/reductase SDR family member 2       | CK313067                        | - | 5, 23      |
| DOCK4   | Dedicator of cytokinesis 4                        | DV953606                        | - | 29         |
| EML5    | echinoderm microtubule associated protein like 5  | CK317261                        | - |            |
| ENOX1   | ecto-NOX disulfide-thiol exchanger 1              | DV961675                        | - |            |
| EPB41L2 | Erythrocyte membrane protein band 4.1-like 2      | DV961341                        | - | 16         |
| FAM18A  | Hypothetical protein LOC780776                    | CK312908                        | - |            |
| FAM152A | FAM152A                                           | CK235192                        | - | 110        |
| FAM5C   | BMP and Retinoic Acid Inducible Protein-3         | DV954478                        | - | 91         |
| FAM84A  | NSE1                                              | DV951531                        | - | 45         |
| FJX1    | Four-jointed protein (fj gene).                   | DV952932                        | - |            |
| FNBP1   | Formin binding protein 1                          | CK305640                        | - |            |
| FSTL4   | Follistatin-like 4                                | CK312465                        | - |            |
| GALNTL  | UDP-N-acetyl-alpha-D-galactosamine:polypeptide    | DV961240                        | - |            |
| GAS7    | Growth arrest-specific 7 isoform c                | DV953799                        | - | 15, 19, 61 |
| GLRA2   | Glycine receptor alpha 2                          | CK307985, DV947472, DV956508, D | - |            |
| GPR173  | Probable G-protein coupled receptor 173           | CK311142                        | - |            |
| GPR177  | G protein-coupled receptor 177                    | CK304903                        | - |            |
| GPR98   | G protein-coupled receptor 98 precursor           | CK306286                        | - |            |
| GRIA4   | Glutamate receptor ionotropic AMPA 4              | DV961576                        | - |            |
| GRIK2   | Glutamate receptor 6 isoform 1 precursor          | DV956587                        | - |            |
| GRM1    | Glutamate receptor, metabotropic 1                | DV960061                        | - |            |
| GRM5    | Glutamate receptor, metabotropic 5                | CK301242                        | - |            |
| GRRP1   | GRRP1                                             | CK309164                        | - |            |
| HMG2L1  | High mobility group box 2-like 1                  | CK302461                        | - | 102        |
| HOPX    | Homeodomain-only protein (Odd homeobox protein 1) | DV951479                        | - |            |
| HPCAL1  | Hippocalcin-like 1                                | CK316984                        | - |            |
| HRH3    | Histamine H3 receptor                             | DV959303                        | - |            |
| HS3ST1  | Heparan sulfate glucosamine 3-O-sulfotra          | CK304125, DV959802*             | - |            |
| KCNC2   | Potassium voltage gated channel Shaw-related      | CK311592                        | - |            |
| KCND2   | Potassium voltage-gated channel Shal-related      | DV956417                        | - |            |
| KCNF1   | Potassium voltage-gated channel subfamily F       | CK306387, DV956078              | - |            |

|                 |                                                     |                                     |   |                 |
|-----------------|-----------------------------------------------------|-------------------------------------|---|-----------------|
| KCNIP1          | Kv channel-interacting protein 1                    | CK305253, DV951220*                 | - |                 |
| KCNK10          | Potassium channel subfamily K member 10             | DV957671                            | - |                 |
| <u>KCNK5</u>    | Potassium channel subfamily K member 5              | DV953320                            | - |                 |
| <u>KIAA1549</u> | Hypothetical protein LOC512679                      | DV948066, DV946365                  | - |                 |
| KLHL2           | Kelch-like protein 2 (Actin-binding protein Mayven) | CK311719                            | - | 13, 38          |
| LIN7A           | Lin-7 homolog A                                     | CK307101                            | - | 11              |
| LOC345222       | Hypothetical protein LOC345222                      | CK310874                            | - |                 |
| LOC418413       | Hypothetical protein LOC418413                      | DV960503                            | - |                 |
| LOC771589       | Hypothetical protein LOC771589                      | DV946404                            | - |                 |
| LOC771914       | Hypothetical protein LOC771914                      | DV947077                            | - |                 |
| LPPR4           | Lipid phosphate phosphatase family                  | DV955659                            | - |                 |
| <u>LRR1Q1</u>   | Leucine-rich repeats and IQ motif containing 1      | DV956844                            | - |                 |
| MAP7            | Microtubule-associated protein 7                    | DV960895                            | - |                 |
| MARCKS          | Myristoylated alanine-rich C-kinase substrate       | CK312689, DV955758                  | - | 14, 35, 56, 105 |
| <u>MEGF6</u>    | EGF-like-domain multiple 3                          | CK315335                            | - |                 |
| MEIS1           | Meis1 homolog                                       | CK311803                            | - | 21, 79          |
| MMEL1           | Membrane metallo-endopeptidase                      | DV950386                            | - |                 |
| <u>MMD2</u>     | Monocyte to macrophage                              | CK311668                            | - |                 |
| MPPED1          | Metallophosphoesterase domain containing 1          | DV946651                            | - |                 |
| MTPN            | Myotrophin                                          | CK304305                            | - |                 |
| MYCN            | N-myc proto-oncogene protein                        | CK308936                            | - | 40              |
| MYO1B           | Myosin Ib                                           | CK235788, CK305346, <u>DV952542</u> | - |                 |
| NAP1L4          | Nucleosome assembly protein 1-like 4                | CK315498                            | - |                 |
| NEUROD1         | Neurogenic differentiation 1                        | DV945348                            | - |                 |
| NOL4            | Nucleolar protein 4                                 | CK234421, CK306792                  | - | 99              |
| NOP5/NOP5       | Nucleolar protein NOP5/ NOP58                       | DV957014                            | - | 65, 71          |
| NRXN3           | Neurexin 3 isoform alpha precursor                  | CK317422, DV957019                  | - |                 |
| <u>NSUN6</u>    | NOL1/NOP2/Sun domain family, member 6               | CK314629                            | - |                 |
| Odz3            | Odd Oz/ten-m homolog 3                              | DV947941                            | - |                 |
| PAIP1           | Poly(A) binding protein interacting protein 1       | DV953504                            | - |                 |
| PCBP3           | Poly(rC) binding protein 3                          | DV951913                            | - |                 |
| PDGFRA          | Platelet-derived growth factor receptor alpha       | DV949723                            | - | 2, 105          |
| <u>PHLDB2</u>   | Pleckstrin homology-like domain family B            | CK301530                            | - | 53              |



|         |                                                       |                    |             |
|---------|-------------------------------------------------------|--------------------|-------------|
| PLCXD3  | Phosphatidylinositol-specific phospholipase C         | DV948267           | -           |
| PLD1    | Phospholipase D1 phosphatidylcholine-specific         | CK305385           | 42, 74      |
| PLXNA1  | Plexin A1                                             | DV960964           | -           |
| PPFIBP1 | PTPRF interacting protein binding protein 1           | DV958897           | 89          |
| PRKAR2B | cAMP-dependent protein kinase regulatory              | CK313635, CK313713 | -           |
| PRKCD   | Protein kinase C delta                                | CK316407           | 51, 76, 81  |
| PRR5    | Proline rich 5 (renal)                                | DV945125           | -           |
| PTER    | Phosphotriesterase related                            | CK302959, CK305472 | -           |
| PTPRZ1  | Phosphotyrosyl phosphatase                            | CK314246, CK315330 | -           |
| PVRL1   | Poliovirus receptor related protein 1                 | CK304335           | 48, 113     |
| RAB36   | Ras-related protein Rab-36                            | CK303949           | -           |
| RASD2   | RasD family member 2                                  | CK301759, CK307974 | -           |
| RASGRF1 | Ras protein-specific guanine                          | CK305981           | 7, 111      |
| RASL11A | Ras-like, family 11, member A                         | CK316558           | -           |
| RASL12  | Ras-like, family 12                                   | CK304375, CK315695 | -           |
| RELN    | Reelin isoform a                                      | CK316482           | 72          |
| RFTN1   | Raft-linking protein                                  | DV951317           | -           |
| RGS12   | Regulator of G-protein signalling 12 isoform 2        | CK308262           | 82, 85, 107 |
| RGS16   | Regulator of G-protein signalling 16                  | DV952832           | -           |
| RPL18A  | Ribosomal protein L18a                                | DV949155           | -           |
| RPRML   | Reprimo-like                                          | DV949746           | -           |
| RSPO3   | R-spondin 3                                           | DV947295           | -           |
| SCN3B   | Sodium channel, voltage-gated, type III, beta         | CK301607, CK315207 | -           |
| SEMA3A  | Semaphorin 3A                                         | CK304131           | -           |
| SEMA6A  | Semaphorin 6A domain transmembrane domain             | CK308635           | -           |
| SHC1    | SHC transforming protein 1                            | DV961745           | 68          |
| SHC3    | Src homology 2 domain containing transforming protein | DV954662           | 17          |
| SLC32A1 | Solute carrier family 32 member 1                     | CK306580           | -           |
| SNRK    | SNF Related Kinase                                    | CK235150           | 8, 88, 114  |
| SPSB4   | PRY domain-containing SOCS box protein                | CK305838           | -           |
| SYT10   | Synaptotagmin X                                       | DV959162           | -           |
| TAC1    | Tachykinin precursor 1                                | CK301285, DV958953 | -           |
| TCOF1   | Treacher Collins-Franceschetti syndrome 1             | DV961952           | -           |

|                 |                                                 |                    |   |     |
|-----------------|-------------------------------------------------|--------------------|---|-----|
| TIMM23          | Translocase of inner mitochondrial membrane 23  | DV954624           | - |     |
| TIMP3           | Metalloproteinase inhibitor 3 precursor         | DV945697, CK317419 | - |     |
| TLL1            | Tolloid-like 1                                  | CK306427           | - |     |
| <u>TMEM158</u>  | Ras-induced senescence 1                        | DV959600           | - |     |
| TMEPAI          | Transmembrane prostate androgen-induced protein | DV946041           | - | 108 |
| TNFAIP8L3       | Tumor necrosis factor alpha-induced protein     | DV945072, DV956728 | - |     |
| TOX2            | TOX high mobility group box family member 2     | DV955585           | - |     |
| TRIB2           | Tribbles homolog 2                              | CK301526, CK301680 | - | 59  |
| <u>TRP53i11</u> | Trp53 inducible protein 11                      | CK312269           | - |     |
| TUBGCP5         | Gamma-tubulin complex component 5               | CK306882           | - |     |
| UBE2D3          | Ubiquitin-conjugating enzyme E2 D3              | CK313794           | - | 28  |
| <u>UNC5C</u>    | Netrin receptor                                 | DV952298           | - |     |
| <u>USP46</u>    | Ubiquitin specific peptidase 46                 | DV952053           | - |     |
| <u>ZDHHC22</u>  | Zinc finger DHHC domain containing 22           | CK308396, DV956166 | - |     |
| ZNF423          | Zinc finger protein 423                         | DV958428           | - | 49  |
| Unknown         | Contaminant complex 1 (zebra finch)             | none               | - |     |
| Unknown         |                                                 | CK235923           | - |     |
| Unknown         |                                                 | CK311781           | - |     |
| Unknown         |                                                 | CK301827           | - |     |
| Unknown         |                                                 | CK302798           | - |     |
| Unknown         |                                                 | CK316508           | - |     |
| Unknown         |                                                 | CK315179           | - |     |
| Unknown         |                                                 | CK306924           | - |     |
| Unknown         |                                                 | CK307201           | - |     |
| Unknown         |                                                 | CK308337           | - |     |
| Unknown         | RIKEN cDNA C630035N08, contaminant complex 2    | CK309395           | - |     |
| Unknown         |                                                 | DV945794           | - |     |
| Unknown         |                                                 | DV946239           | - |     |
| Unknown         |                                                 | DV946874           | - |     |
| Unknown         |                                                 | DV949079           | - |     |
| Unknown         |                                                 | DV950695           | - |     |
| Unknown         |                                                 | DV951401           | - |     |
| Unknown         |                                                 | DV952261           | - |     |

|         |                    |   |  |
|---------|--------------------|---|--|
| Unknown | DV953500           | - |  |
| Unknown | DV953909           | - |  |
| Unknown | DV954593           | - |  |
| Unknown | DV954727           | - |  |
| Unknown | DV955038           | - |  |
| Unknown | DV955453           | - |  |
| Unknown | DV955986           | - |  |
| Unknown | DV959089, DV954221 | - |  |
| Unknown | DV960158           | - |  |
| Unknown | DV960513           | - |  |
| Unknown | DV960601           | - |  |
| Unknown | DV960989           | - |  |
| Unknown | DV961039           | - |  |

Tentative gene identifications are underlined (see methods for details).

\* See References S1 for references cited in this table.
