# Supplementary material for: Birdsong “Transcriptomics”: Neurochemical Specializations of the Oscine Song System
Source: PubMed Central journal article supplement (PMC2563692; doi:10.1371/journal.pone.0003440), 2008-10-20
Supplement: pone.0003440.s003.pdf [file pone.0003440.s003.pdf]

**Table S2. Secondary List of Differential Expressed HVC Markers**

| <b>Entrez</b>                                             | <b>Gene Name Annotated Gene Name</b>                              | <b>Gene Regulation</b> | <b>Genbank Accession</b> |
|-----------------------------------------------------------|-------------------------------------------------------------------|------------------------|--------------------------|
| <b><i>CELL ADHESION AND CYTOSKELETAL ORGANIZATION</i></b> |                                                                   |                        |                          |
| CDH1                                                      | Cadherin 1, type 1, E-cadherin (epithelial)                       | +                      | DV947236                 |
| COL2A1                                                    | Procollagen, type II, alpha 1                                     | +                      | CK304054                 |
| COL6A1                                                    | Collagen, type VI, alpha 1                                        | +                      | CK303649                 |
| COL10A1                                                   | Collagen, type X, alpha 1                                         | +                      | CK308288                 |
| COL12A1                                                   | Collagen, type XII, alpha 1                                       | +                      | CK312236                 |
| CTNNA1                                                    | Catenin (cadherin-associated protein), alpha 1, 102kDa            | +                      | DV955801                 |
| SSX2IP                                                    | Synovial sarcoma, X breakpoint 2 interacting protein              | -                      | DV949510                 |
| <b><i>AXON GUIDANCE AND NEURITE OUTGROWTH</i></b>         |                                                                   |                        |                          |
| PLXNB1                                                    | Plexin B1                                                         | -                      | CK314407                 |
| <b><i>NEUROTRANSMISSION AND CELLULAR EXCITABILITY</i></b> |                                                                   |                        |                          |
| CACNA1D                                                   | Calcium channel, voltage-dependent, L type, alpha 1D subunit      | -                      | DV952804                 |
| CHRM4                                                     | Cholinergic receptor, muscarinic 4                                | +                      | DV955103                 |
| KCNAB1                                                    | Potassium voltage-gated channel, shaker-related subfamily, beta 1 | +                      | CK303535                 |
| KCNC1                                                     | Potassium voltage-gated channel, Shaw-related subfamily, member 1 | +                      | DV948250                 |
| KCNC3                                                     | Potassium voltage gated channel, Shaw-related subfamily, member 3 | +                      | DV953393                 |
| KCNG1                                                     | Potassium voltage-gated channel, subfamily G, member 1            | -                      | CK315176                 |
| KCNS2                                                     | Potassium voltage-gated channel, delayed-rectifier, subfamily S2  | -                      | CK315983                 |
| KCNV1                                                     | Potassium channel, subfamily V, member 1                          | +                      | DV947438                 |
| <b><i>CELL PROLIFERATION, SURVIVAL, AND DEATH</i></b>     |                                                                   |                        |                          |
| ACVR1                                                     | Activin A receptor, type I                                        | -                      | DV961653                 |
| GADD45G                                                   | Growth arrest and DNA-damage-inducible, gamma                     | -                      | CK304105                 |
| LTBP1                                                     | Latent transforming growth factor beta binding protein 1          | +                      | CK315502                 |
| TRAIP                                                     | TRAF interacting protein                                          | -                      | DV960928                 |
| TGFBR2                                                    | TGF-beta receptor type II                                         | +                      | DV956964                 |
| <b><i>RETINOIC ACID SIGNALING</i></b>                     |                                                                   |                        |                          |

|             |                                                 |   |          |
|-------------|-------------------------------------------------|---|----------|
| CBX3        | Chromobox homolog 3                             | - | CK303377 |
| CXCR4       | Chemokine (C-X-C motif) receptor 4              | + | CK303587 |
| DBC1        | Deleted in bladder cancer 1                     | + | CK307950 |
| FRZB        | Frizzled-related protein                        | + | DV960300 |
| GTF2H1      | General transcription factor IIH, polypeptide 1 | + | DV955862 |
| HSD17B11/13 | Hydroxysteroid (17-beta) dehydrogenase 11/13    | - | DV951599 |
| JAG1        | Jagged 1 (Alagille syndrome)                    | - | CK308079 |
| JUN         | jun oncogene                                    | - | DV945400 |
| NDRG1       | N-myc downstream regulated gene 1               | + | CK316108 |
| RAI1        | Retinoic acid-induced protein 1                 | + | CK315235 |
| RAI14       | Retinoic acid induced 14                        | - | DV961572 |
| SFRP2       | Secreted frizzled-related protein 2             | + | DV959544 |
