# Supplementary material for: Birdsong “Transcriptomics”: Neurochemical Specializations of the Oscine Song System
Source: PubMed Central journal article supplement (PMC2563692; doi:10.1371/journal.pone.0003440), 2008-10-20
Supplement: pone.0003440.s004.pdf [file pone.0003440.s004.pdf]

**Table S3. Previously Confirmed Markers of HVC.**

| <b>Entrez</b> | <b>Gene Name</b> | <b>Annotated Gene Name</b>                   | <b>Genbank Accession</b>      | <b>Evidence of Enrichment</b>   |
|---------------|------------------|----------------------------------------------|-------------------------------|---------------------------------|
| ALDH1A2       |                  | Retinal dehydrogenase 2 (zRAlDH)             | DV957057, CK234972            | Denisenko-Nehrbass et al., 2000 |
| CAMTA1        |                  | Calmodulin-binding transcription activator 1 | CK313520                      | Li et al., 2007                 |
| NEFL          |                  | Neurofilament triplet light (NF-M)           | CK304961                      | Velho et al., 2006              |
| NEFM          |                  | Neurofilament triplet medium (NF-L)          | CK313443                      | Velho et al., 2006              |
| FNTM2         |                  | Phantom2                                     | DV954885, CK234984            | Agate et al., 2007              |
| IGF2*         |                  | Insulin growth factor 2                      | CK308292                      | Holzenberger et al., 1997       |
| KCNA1*        |                  | Voltage-gated potassium channel C3           | DV953393                      | Velho and Mello, unpublished    |
| SNCA*         |                  | Alpha-synuclein                              | DV950418                      | George et al., 1995             |
| GRM8*         |                  | Glutamate receptor, metabotropic 8           | CK314839                      | Li et al., 2007                 |
| PVALB         |                  | Parvalbumin                                  | CK305573                      | Wild et al., 2005               |
| CYP19A1       |                  | P450 aromatase                               | DV954113, DV951351            | Chen et al., 1995               |
| GRIA2*        |                  | Glutamate receptor, ionotropic AMPA 2        | CK234665, CK306281, CK312715  | Wada et al., 2004               |
| GRIA3*        |                  | Glutamate receptor, ionotropic AMPA 3        | DV945013                      | Wada et al., 2004               |
| GRIA4*        |                  | Glutamate receptor, ionotropic AMPA 4        | CK316778                      | Wada et al., 2004               |
| GRIK2         |                  | Glutamate receptor, ionotropic kainate 4     | DV956587                      | Wada et al., 2004               |
| GRM1          |                  | Glutamate receptor, metabotropic 1           | DV960061                      | Wada et al., 2004               |
| <u>GRM5</u>   |                  | Glutamate receptor, metabotropic 5           | CK301242                      | Wada et al., 2004               |
| CHN1*         |                  | N-chimaerin                                  | CK312097                      | Clayton and George, 1992        |
| RELN          |                  | Reelin isoform                               | CK316482                      | Li et al., 2007                 |
| GRM3*         |                  | Glutamate receptor, metabotropic 3           | CK301471, CK317241, CK308692, | Wada et al., 2004               |
| GRIK3*        |                  | Glutamate receptor, ionotropic kainate 3     | CK234667, DV946752            | Wada et al., 2004               |
| GRIN1*        |                  | Glutamate receptor, ionotropic NMDA 1        | CK311421                      | Wada et al., 2004               |
| DBC1*         |                  | Deleted in bladder cancer 1                  | CK307950                      | Wood et al., 2008               |
| HSD17B11/13*  |                  | Hydroxysteroid (17-beta) dehydrogenase 11/13 | DV951599                      | Wood et al., 2008               |

Tentative gene identifications are underlined (see methods for details).

\* Gene was present on the secondary gene list (Supplementary Table 2).
