# Supplementary material for: Birdsong “Transcriptomics”: Neurochemical Specializations of the Oscine Song System
Source: PubMed Central journal article supplement (PMC2563692; doi:10.1371/journal.pone.0003440), 2008-10-20
Supplement: pone.0003440.s005.pdf [file pone.0003440.s005.pdf]

**Table S4. Microarray validations by *in situ* hybridization**

| Entrez Name | Genbank Accession | Annotated Gene Name                               | Array Predict. | Stat. Confirm.   | Fold † Enrich. | Expression in Song Nuclei <sup>α</sup> |    |                  |    |
|-------------|-------------------|---------------------------------------------------|----------------|------------------|----------------|----------------------------------------|----|------------------|----|
|             |                   |                                                   |                |                  |                | HVC                                    | RA | LMAN             | X  |
| S100B       | DV950377          | S-100 calcium-binding protein b-subunit           | +              | P < 0.01         | 10.0           | +                                      | +  | +                | +  |
| C14orf173   | DV953705          | Inverted Formin 2                                 | +              | P < 0.001        | 4.1            | +                                      | ND | +                | ND |
| MUSTN1      | DV958286          | Musculoskeletal, embryonic nuclear 1              | +              | P < 0.01         | 2.7            | +                                      | ND | ND               | ND |
| CADPS2      | DV955943          | Ca <sup>2+</sup> -dependent secretion activator 3 | +              | P < 0.05         | 2.6            | +                                      | ND | ND               | +  |
| AIM1        | DV953279          | Absent in melanoma 1, predicted                   | +              | P < 0.001        | 2.6            | +                                      | ND | ND               | ND |
| ADSSL1      | CK312450          | Adenylosuccinate synthetase 1                     | +              | P < 0.001        | 2.2            | +                                      | ND | +                | ND |
| HTR1F       | CK302146          | Serotonin Receptor 1F                             | +              | P < 0.05         | 2              | +                                      | ND | ND               | ND |
| NRP1        | DV955873          | Neuropilin 1                                      | +              | √                | 1.9            | +                                      | ND | ND               | +  |
| MAP4        | DV960946          | Microtubule-associated protein 4                  | +              | P < 0.05         | 1.8            | +                                      | +  | +                | -  |
| Unknown     | DV947307          | Unknown                                           | +              | √                | 1.7            | +                                      | ND | ND               | +  |
| PTGER4      | DV958814          | Prostaglandin E receptor 4 subtype EP4            | +              | √                | 1.7            | +                                      | ND | ND               | ND |
| CHRNA7      | DV957289          | Neuronal acetylcholine receptor a-7               | +              | P < 0.05         | 1.6            | +                                      | ND | ND               | ND |
| MAPK11      | CK310452          | Mitogen-activated protein kinase 11               | +              | P = 0.08         | 1.6            | +                                      | ND | +                | ND |
| CRHBP       | DV945761          | Corticotropin-releasing factor binding p          | +              | √                | 1.5            | +                                      | ND | ND               | ND |
| SLC7A2      | CK309001          | Solute carrier family 7 member 2 iso 2            | +              | P < 0.01         | 1.4            | +                                      | ND | ND               | ND |
| CHRM4*      | DV955103          | Muscarinic acetylcholine receptor M4              | +              | √                | 1.4            | +                                      | ND | ND               | +  |
| NTS         | CK302282          | Neurotensin/neuromedin N precursor                | +              | P < 0.05         | 1.3            | +                                      | ND | ND               | +  |
| CHRNA5      | DV949835          | Cholinergic receptor nicotinic alpha-5            | +              | √                | 1.3            | +                                      | ND | -                | +  |
| FST         | CK304072          | Follistatin                                       | +              | √                | 1.2            | +                                      | ND | ND               | ND |
| Unknown     | CK315619          | Unknown                                           | +              | √                | 1.2            | +                                      | ND | ND               | ND |
| PLXNA4      | DV951095          | Plexin-4A                                         | +              | √                | 1.2            | +                                      | ND | ND               | ND |
| SEMA3A      | CK304131          | Semaphorin-3A                                     | -              | √                | -2.1           | -                                      | -  | ND               | ND |
| RSP03       | DV947295          | R-spondin 3                                       | -              | P < 0.05         | -2.2           | -                                      | +  | -                | ND |
| GLRA2       | DV947472          | Glycine receptor alpha 2                          | -              | P < 0.01         | -2.5           | -                                      | -  | ND               | ND |
| CHRNA2*     | DV955395          | Neuronal acetylcholine receptor, a-2              | ND             | √                | ND             | ND                                     | ND | ND               | ND |
| CHRNA2/4*   | DV950553          | Neuronal acetylcholine receptor, a-2/4            | ND             | √                | ND             | ND                                     | ND | ND               | ND |
| CHRM2*      | DV954101          | Muscarinic acetylcholine receptor M2              | ND             | √                | ND             | ND                                     | ND | ND               | ND |
| CRISPLD1    | DV952515          | Cysteine-rich secretory protein LCCL              | +              | <i>No Signal</i> | ND             |                                        |    | <i>No Signal</i> |    |
| BMPR2       | CK316243          | Bone Morphogenic Protein Receptor 2A              | -              | <i>No Signal</i> | ND             |                                        |    | <i>No Signal</i> |    |

Tentative gene identifications are underlined (see methods for details).

† Average fold-differences in optical density (i.e. expression) over HVC versus Shelf measured from *in situ* autoradiograms (minimum n=2)

α Expression relative to surrounding tissue (i.e. HVC vs Shelf; RA vs A; LMAN vs N; X vs St); ND = No difference

β Abbreviations: H, Hyperpallium; M, Mesopallium; N, Nidopallium; A, Arcopallium; L2a, field L2a; Bas, Basorostralis, Nif, Nucleus interfacialis; V, ventricle; St, Striatum

\* Visual confirmation, but sample size too small for ANOVA.

| <b>Brain Areas<sup>p</sup><br/>Enriched</b> |
|---------------------------------------------|
| H, L2a, Bas, V                              |
| St (-)                                      |
|                                             |
| M                                           |
|                                             |
| Bas                                         |
| H                                           |
|                                             |
| M                                           |
|                                             |
| M                                           |
| Bas                                         |
|                                             |
| St (+)                                      |
| M                                           |
|                                             |
|                                             |
| St (-)                                      |
| M, H, St (-)                                |
|                                             |
| M                                           |
| M                                           |
| St (+)                                      |
| <i>No Signal</i>                            |
| <i>No Signal</i>                            |
