# Supplementary material for: Birdsong “Transcriptomics”: Neurochemical Specializations of the Oscine Song System
Source: PubMed Central journal article supplement (PMC2563692; doi:10.1371/journal.pone.0003440), 2008-10-20
Supplement: pone.0003440.s006.pdf [file pone.0003440.s006.pdf]

**Table S5. Extended search Genelist (ND)**

| <b>Entrez Name</b>                                 | <b>Annotated Gene Name</b>                             | <b>Gene Regul.</b> | <b>Genbank Accession</b> |
|----------------------------------------------------|--------------------------------------------------------|--------------------|--------------------------|
| <b>CELL ADHESION AND CYTOSKELETAL ORGANIZATION</b> |                                                        |                    |                          |
| COL3A1                                             | Collagen, type III, alpha 1                            | ND                 | DV955812                 |
| COL5A1                                             | Collagen, type V, alpha 1                              | ND                 | DV959671                 |
| COL7A1                                             | Collagen, type VII, alpha 1                            | ND                 | CK311460                 |
| COL11A1                                            | Collagen, type XI, alpha 1                             | ND                 | DV952180                 |
| COL13A1                                            | Collagen, type XIII, alpha 1                           | ND                 | DV953159                 |
| CTNNA2                                             | Catenin (cadherin-associated protein), alpha 2         | ND                 | DV957691                 |
| CTNNB1                                             | Catenin (cadherin-associated protein), beta 1          | ND                 | CK310135, CK311500       |
| DLG1                                               | Discs large homolog 1 isoform 1                        | ND                 | DV949769                 |
| ITGB1                                              | Integrin beta 1                                        | ND                 | DV961664                 |
| ITGB3                                              | Integrin beta 3                                        | ND                 | DV955122                 |
| ITGB5                                              | Integrin beta-5                                        | ND                 | DV954283                 |
| ITGB8                                              | Integrin beta 8                                        | ND                 | DV961966                 |
| PDGFA                                              | Platelet-derived growth factor alpha polypeptide       | ND                 | DV959989, DV950799       |
| PDGFC                                              | Platelet derived growth factor C                       | ND                 | DV957068                 |
| RAC1                                               | Ras-related C3 botulinum toxin substrate               | ND                 | CK315716, CK314138       |
| ROCK1                                              | Rho-associated coiled-coil containing protein          | ND                 | DV947676                 |
| LIMK1                                              | LIM domain kinase 1                                    | ?                  | Not on array             |
| <b>AXON GUIDANCE AND NEURITE OUTGROWTH</b>         |                                                        |                    |                          |
| PLXNA2                                             | Plexin A2                                              | ND                 | CK311523                 |
| <b>NEUROTRANSMISSION AND CELLULAR EXCITABILITY</b> |                                                        |                    |                          |
| CHRNA2                                             | Cholinergic receptor, nicotinic, alpha 2 (neuronal)    | ND                 | DV950553                 |
| CHRNA4                                             | Cholinergic receptor, nicotinic, alpha 4               | ND                 | DV955395                 |
| CHRNA9                                             | Cholinergic receptor, nicotinic, alpha 9               | ND                 | CK303364                 |
| CHRM2                                              | Cholinergic receptor, muscarinic 2                     | ND                 | DV954101                 |
| HTR1B                                              | 5-hydroxytryptamine (serotonin) receptor 1B            | ND                 | CK303512                 |
| HTR7A                                              | 5-hydroxytryptamine (serotonin) receptor 7A            | ND                 | CK310918                 |
| KCNA4                                              | Potassium voltage-gated channel, shaker-related 4      | ND                 | DV957069, DV952065       |
| KCNA6/7                                            | Potassium voltage-gated channel, shaker-related 6 or 7 | ND                 | DV960691                 |
| KCNQ5                                              | Potassium voltage-gated channel, KQT-like 2            | ND                 | DV946128                 |
| CHRNA1                                             | Cholinergic receptor, nicotinic, alpha 1               | ?                  | Not on array.            |
| CHRNA3                                             | Cholinergic receptor, nicotinic, alpha 3               | ?                  | Not on array.            |
| CHRNA6                                             | Cholinergic receptor, nicotinic, alpha 6               | ?                  | Not on array.            |
| CHRNA8                                             | Cholinergic receptor, nicotinic, alpha 8               | ?                  | Not on array.            |
| CHRNB1                                             | Cholinergic receptor, nicotinic, beta 1                | ?                  | Not on array.            |
| CHRNB2                                             | Cholinergic receptor, nicotinic, beta 2                | ?                  | Not on array.            |
| CHRNB3                                             | Cholinergic receptor, nicotinic, beta 3                | ?                  | Not on array.            |
| CHRM1                                              | Cholinergic receptor, muscarinic 1                     | ?                  | Not on array.            |
| CHRM3                                              | Cholinergic receptor, muscarinic 3                     | ?                  | Not on array.            |
| CHRM5                                              | Cholinergic receptor, muscarinic 5                     | ?                  | Not on array.            |

**CELL PROLIFERATION, SURVIVAL, AND DEATH**

|          |                                                       |    |                    |
|----------|-------------------------------------------------------|----|--------------------|
| ACVR2A   | Activin A receptor, type IIA                          | ND | CK234683, DV956167 |
| AIFM1    | Apoptosis-inducing factor, mitochondrion-associated 1 | ND | CK235030           |
| BFAR     | Bifunctional apoptosis regulator                      | ND | DV960865           |
| CASP3    | Caspase 3, apoptosis-related cysteine peptidase       | ND | CK304919, CK310167 |
| FAM130A2 | TGF beta induced apoptosis protein 2                  | ND | DV945583           |
| GDF3     | Growth differentiation factor 3                       | ND | CK310219           |
| NOG      | Noggin                                                | ND | DV959546           |
| PDCD2    | Programmed cell death 2                               | ND | DV952222, CK311418 |
| PDCD4    | Programmed cell death 4                               | ND | CK313545, DV960500 |
| PDCD5    | Programmed cell death 5                               | ND | CK302153           |
| PDCD6    | Programmed cell death 6 interacting protein           | ND | CK316110           |
| PDGFA    | Platelet-derived growth factor A chain p              | ND | DV950799           |
| SMAD1    | SMAD family member 1                                  | ND | CK317055           |
| SMAD2    | SMAD family member 2                                  | ND | DV952451           |
| SMAD6    | SMAD family member 6                                  | ND | CK303933           |
| SMAD9    | SMAD family member 9                                  | ND | DV954742           |
| TINP1    | TGF beta-inducible nuclear protein 1                  | ND | CK316377           |
| AMHR2A   | Anti-Mullerian hormone receptor, type II              | ?  | Not on array.      |
| BMPR1A   | Bone morphogenetic protein receptor, type 1           | ?  | Not on array.      |
| BMPR1B   | Bone morphogenetic protein receptor, type 1           | ?  | Not on array.      |
| INHBA    | Inhibin, beta A (a.k.a. Activin)                      | ?  | Not on array.      |
| INHBB    | Inhibin, beta B (a.k.a. Activin)                      | ?  | Not on array.      |
| INHBC    | Inhibin, beta C (a.k.a. Activin)                      | ?  | Not on array.      |
| INHBE    | Inhibin, beta E (a.k.a. Activin)                      | ?  | Not on array.      |
| SMAD3    | SMAD family member 3                                  | ?  | Not on array.      |
| SMAD4    | SMAD family member 4                                  | ?  | Not on array.      |
| SMAD5    | SMAD family member 5                                  | ?  | Not on array.      |
| SMAD7    | SMAD family member 7                                  | ?  | Not on array.      |
| SMAD7    | SMAD family member 7                                  | ?  | Not on array.      |
| TGFB3    | Transforming growth factor, beta 3                    | ?  | Not on array.      |

Tentative gene identifications are underlined (see methods for details).
